# Supplementary material for: A high-performance ionic liquid-based microextraction (ILBME) method for the trace determination of paroxetine as a pharmaceutical pollutant in environmental and biological samples
Source: Royal Society of Chemistry journal article supplement (doi:10.1039/d4ay01668h), 2024-01-01
Supplement: d4ay01668h1.pdf [file d4ay01668h1.pdf]

**High-performance ionic liquid-based microextraction method (ILBME) for  
the trace determination of paroxetine as a pharmaceutical pollutant in  
environmental and biological samples**

**Mehdi Hosseini<sup>\*a</sup>**

*Department of Chemistry, Faculty of Basic Sciences, Ayatollah Boroujerdi University,  
Boroujerd, Iran.*

**Supplementary Information**

**Table S1** Determined physical properties of [Hibmim][Cl] ( $n=3$ )

| Properties | Density, g mL <sup>-1</sup> | Refractive index | Boiling point, °C | Melting point, °C | Freezing point, °C |
|------------|-----------------------------|------------------|-------------------|-------------------|--------------------|
| Value      | 1.54±0.05                   | 1.35±0.1         | 274±0.1           | 52±0.05           | -16±0.1            |

**Table S2** Elemental analysis of ionic liquid of [Hibmim][Cl]

| Compound     | Founded (expected) (%) |                |                  |                |                  |
|--------------|------------------------|----------------|------------------|----------------|------------------|
|              | C                      | H              | N                | O              | Cl               |
| [Hibmim][Cl] | 53.28<br>(53.32)       | 8.92<br>(8.95) | 16.90<br>(16.96) | 6.43<br>(6.46) | 14.29<br>(14.31) |

**Table S3** Elemental analysis of {paroxetine-[Hibmim][Cl]} chelate

| Compound                      | Founded (expected) (%) |                |                |                  |                |                |
|-------------------------------|------------------------|----------------|----------------|------------------|----------------|----------------|
|                               | C                      | H              | N              | O                | F              | Cl             |
| {paroxetine-<br>[Hibmim][Cl]} | 62.20<br>(62.43)       | 7.30<br>(7.34) | 9.68<br>(9.71) | 11.00<br>(11.09) | 3.27<br>(3.29) | 6.00<br>(6.14) |

**Table S4** Interaction energies ( $\Delta E_{\text{int}}$ ) and Gibbs free energies ( $\Delta G_{\text{int}}$ ) for various interactions of ionic liquid and paroxetine

| Entry | interaction                     | $E_{\text{cmpx}}$ (a.u.) | $\Delta E_{\text{int}}$ (kJ/mol) | $G_{\text{cmpx}}$ (a.u.) | $\Delta G_{\text{int}}$ (kJ mol <sup>-1</sup> ) |
|-------|---------------------------------|--------------------------|----------------------------------|--------------------------|-------------------------------------------------|
| 1     | O3...H12                        | -2208.82346              | -56.5375                         | -2208.22492              | 3.310756                                        |
| 2     | H4...N13<br>N1...H12            | -2208.82077              | -49.4775                         | -2208.22778              | -4.20605                                        |
| 3     | H2...N13                        | -2208.83161              | -77.9196                         | -2208.23459              | -22.0857                                        |
| 4     | H... $\pi$ (ring)<br>C15...H12) | -2208.84446              | -111.681                         | -2208.24252              | -42.9059                                        |
| 5     | H4...O15<br>C15...H12           | -2208.84910              | -123.847                         | -2208.24398              | -46.7392                                        |
| 6     | H2...O15                        | -2208.84219              | -105.708                         | -2208.23707              | -28.6074                                        |
| 7     | H2...F14<br>C15...H12           | -2208.83625              | -90.1255                         | -2208.23834              | -31.9235                                        |

**Table S-5** Comparison of various counter ions used as phase separation agents ( $n=3$ )

| Counter ion                   | Extraction efficiency of paroxetine (%) |
|-------------------------------|-----------------------------------------|
| PF <sub>6</sub> <sup>-</sup>  | 98.6±1.9                                |
| NTF <sub>2</sub> <sup>-</sup> | 98.2±2.2                                |
| BF <sub>4</sub> <sup>-</sup>  | 89.7±2.0                                |

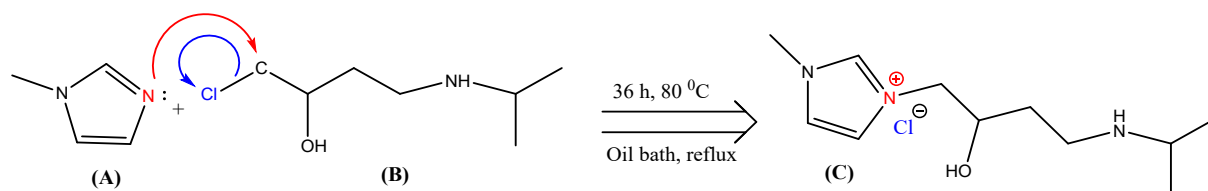

**Fig. S1** The synthesis route of the 3-(2-hydroxy-4-(isopropylamino)butyl)-1-methylimidazolium chloride ([Hibmim][Cl]).

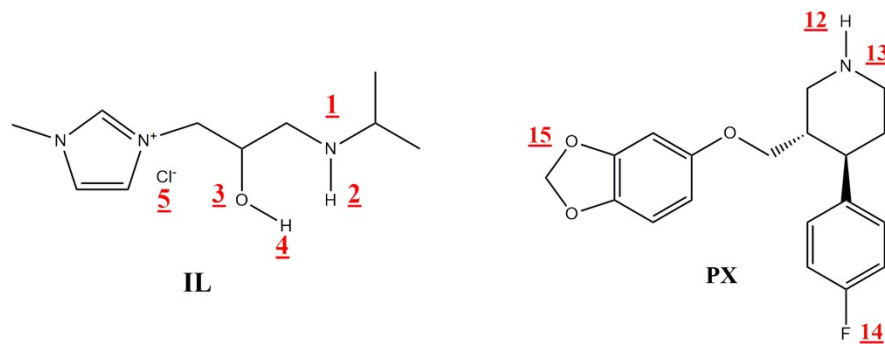

**Fig. S2** The optimized geometries of paroxetine (PX) and the ionic liquid (IL) using the M06-2X functional and the 6-31G(d,p) basis set.



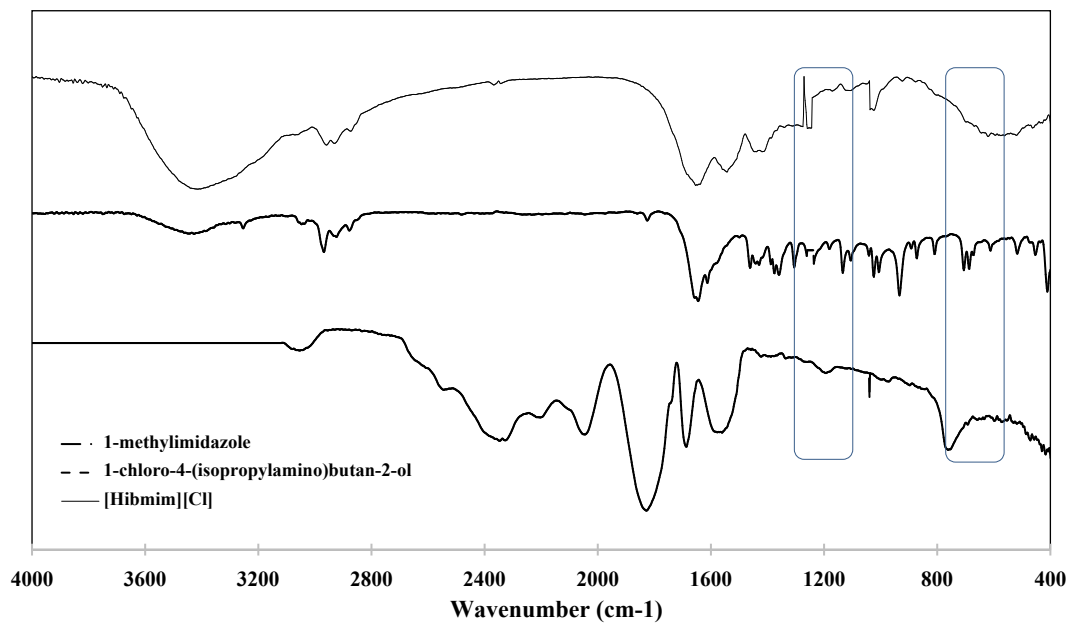

**Fig. S3** FTIR spectra for the raw materials and the resulting ionic liquid [Hibmim][Cl].

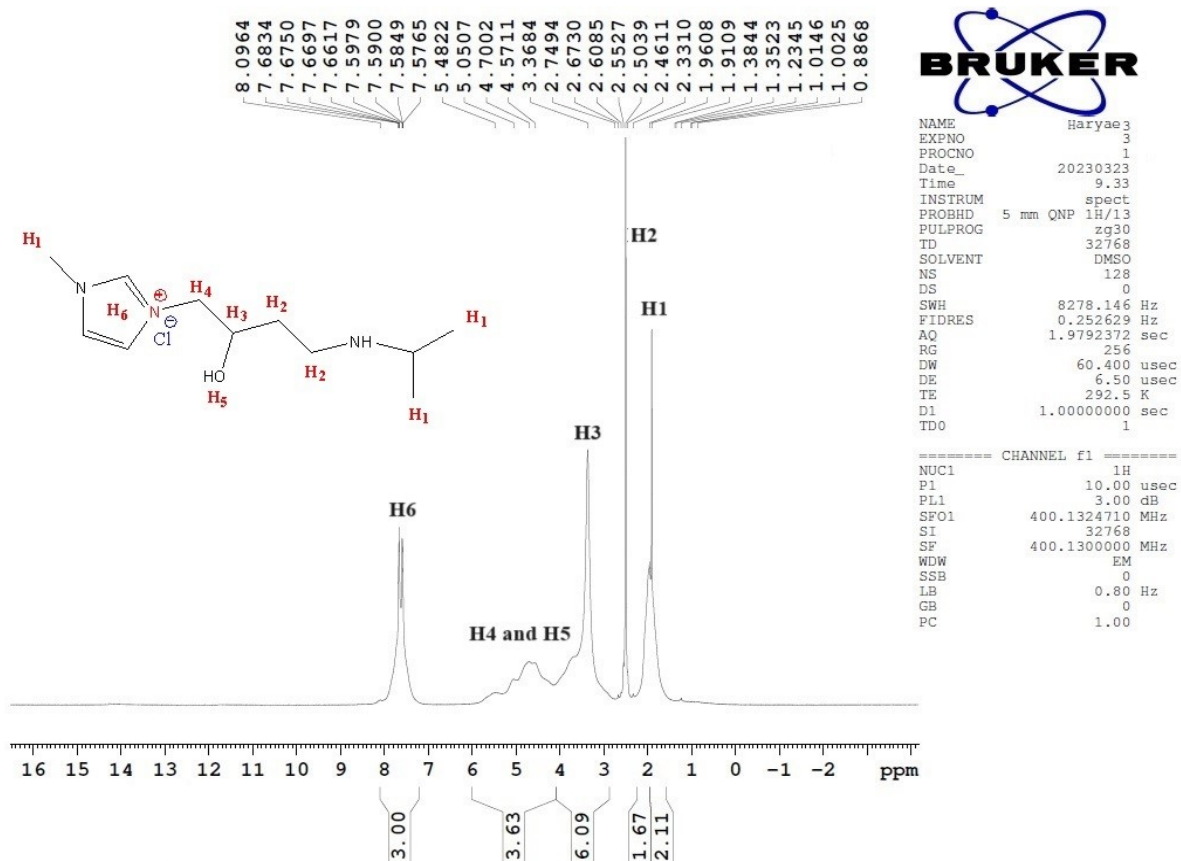

Fig. S4 <sup>1</sup>H NMR of ionic liquid of [Hibmim][Cl].

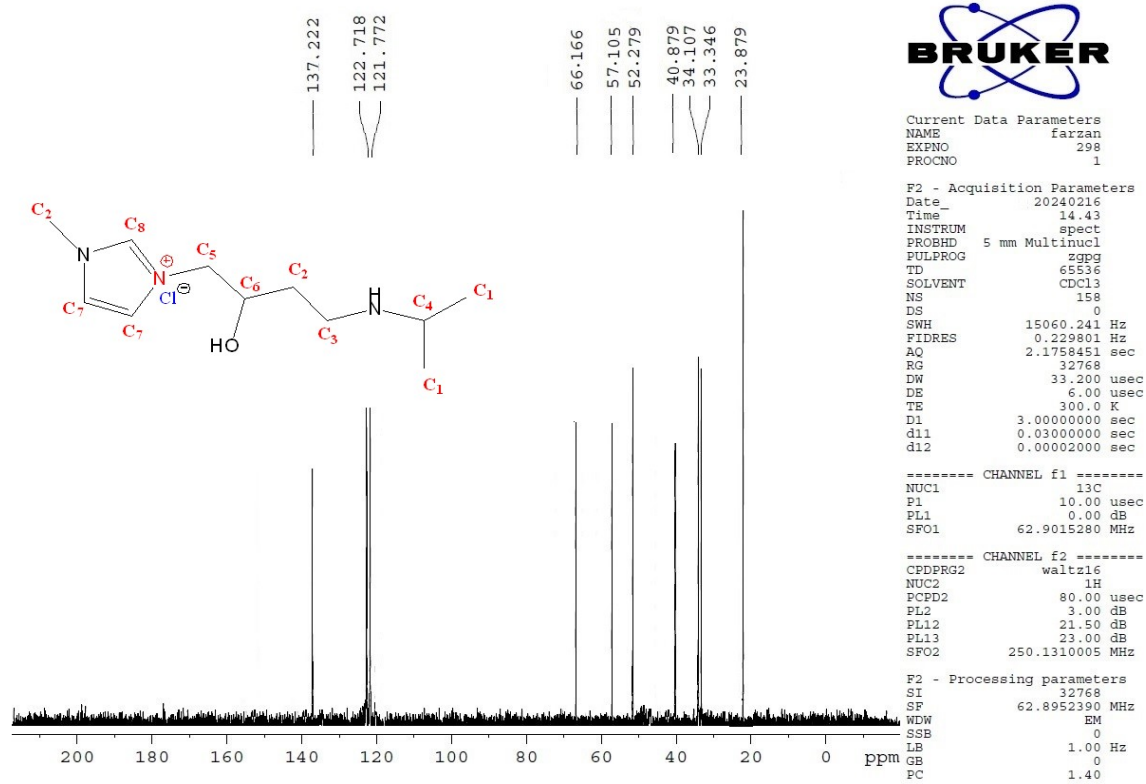

Fig. S5  $^{13}\text{C}$ NMR of ionic liquid of [Hibmim][Cl].

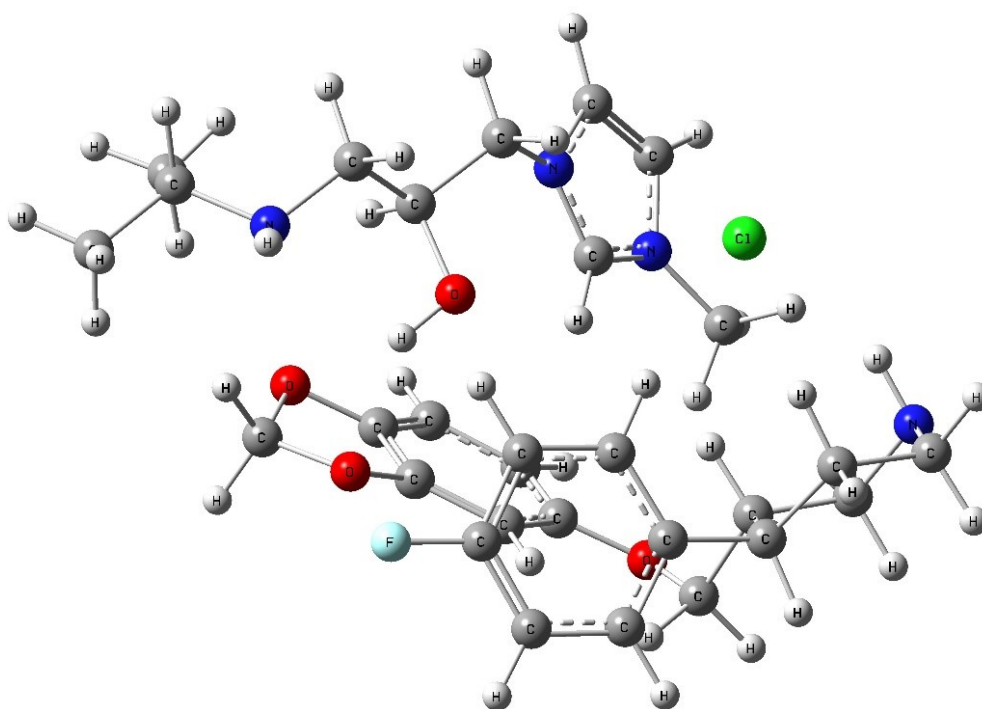

**Fig. S6** The optimized geometry of most stable complex between ionic liquid and paroxetine.

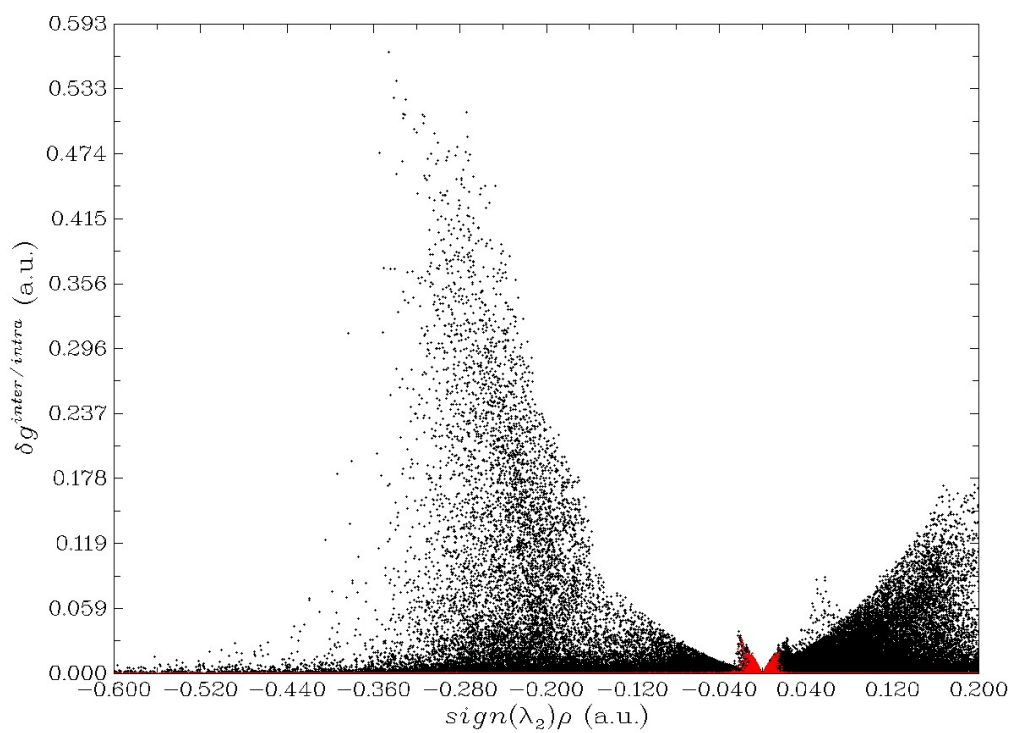

**Fig. S7** The different values of isosurface  $\delta g$  function and  $\text{sign}(\lambda_2)\rho$ .

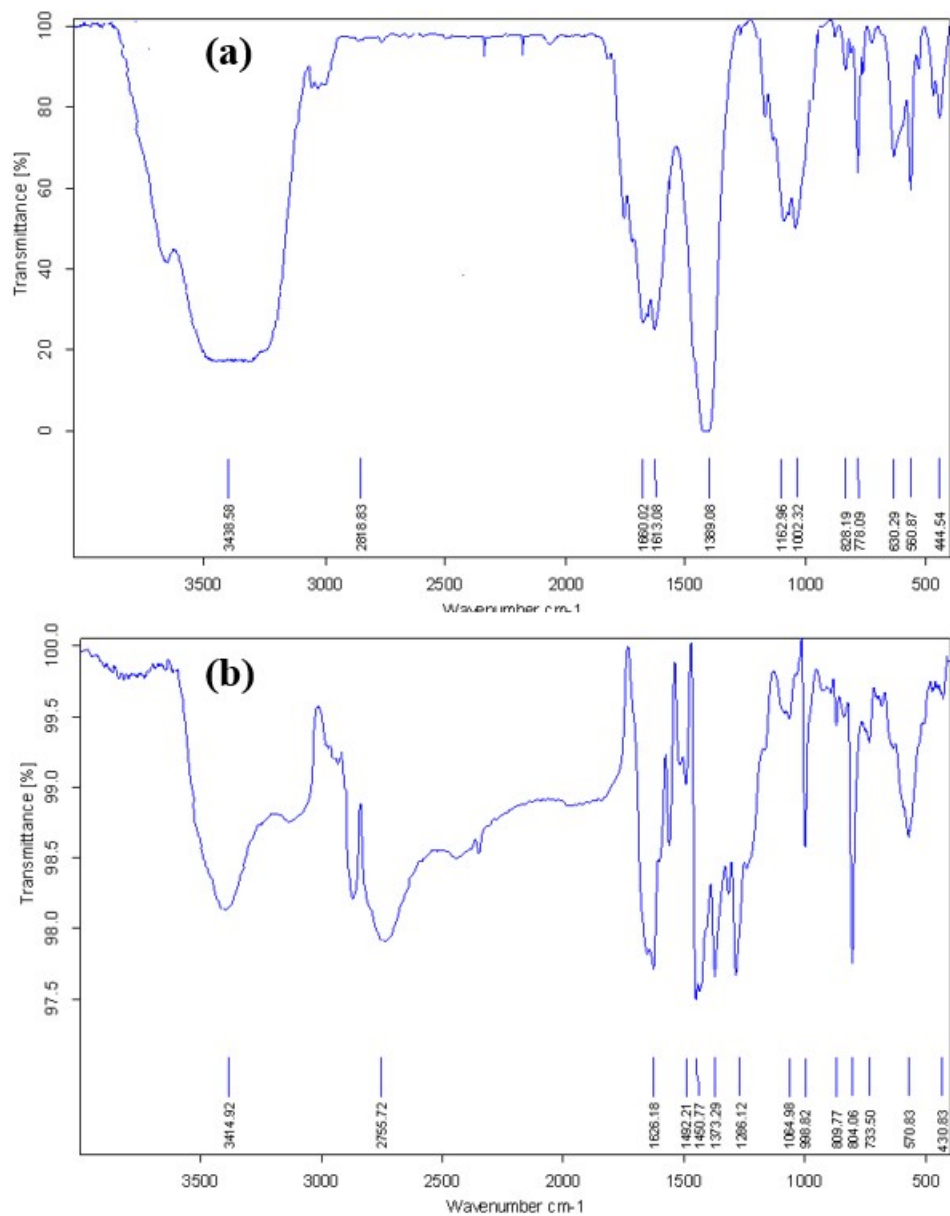

**Fig. S8** FTIR spectra for (a) paroxetine before extraction and (b) complexed paroxetine after extraction.

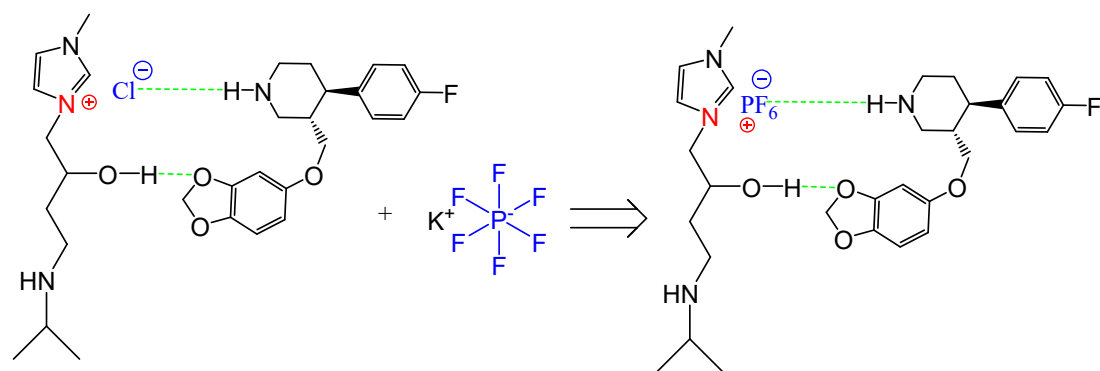

Hydrophilic complex of {paroxetine-[Hibmim][Cl]}

Hydrophobic complex of {paroxetine-[Hibmim][PF<sub>6</sub>]}

**Fig. S9** The change in polarity from the hydrophilic chelate {paroxetine-[Hibmim][Cl]} to the hydrophobic chelate {paroxetine-[Hibmim][PF<sub>6</sub>]}.

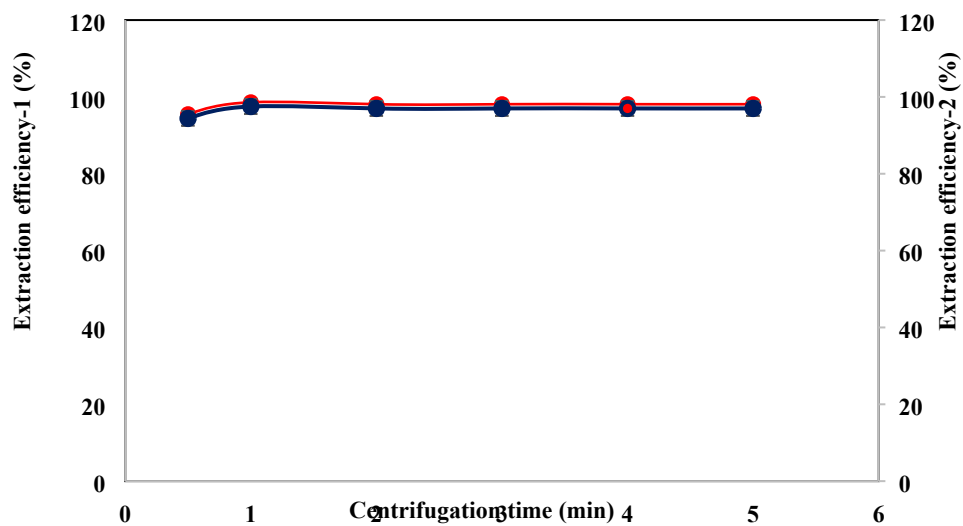

**Fig. S10** The effect centrifugation time on the extraction efficiency of paroxetine. Investigated conditions: varying centrifugation time, pH of 7.0, 100 mg of IL, 75 mg of  $\text{PF}_6^-$ , 20,000  $\text{mg L}^{-1}$  of NaCl and centrifugation at 2000 rpm.



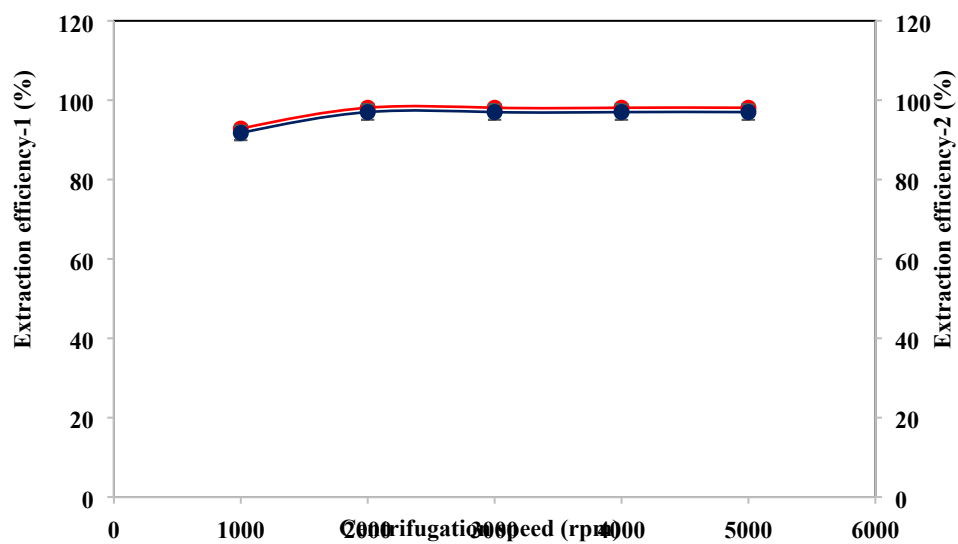

**Fig. S11** The effect centrifugation speed on the extraction efficiency of paroxetine. Investigated conditions: varying centrifugation speed, pH of 7.0, 100 mg of IL, 75 mg of  $\text{PF}_6^-$ , 20,000 mg  $\text{L}^{-1}$  of NaCl and centrifugation for 1 min. (B) The effect of ionic

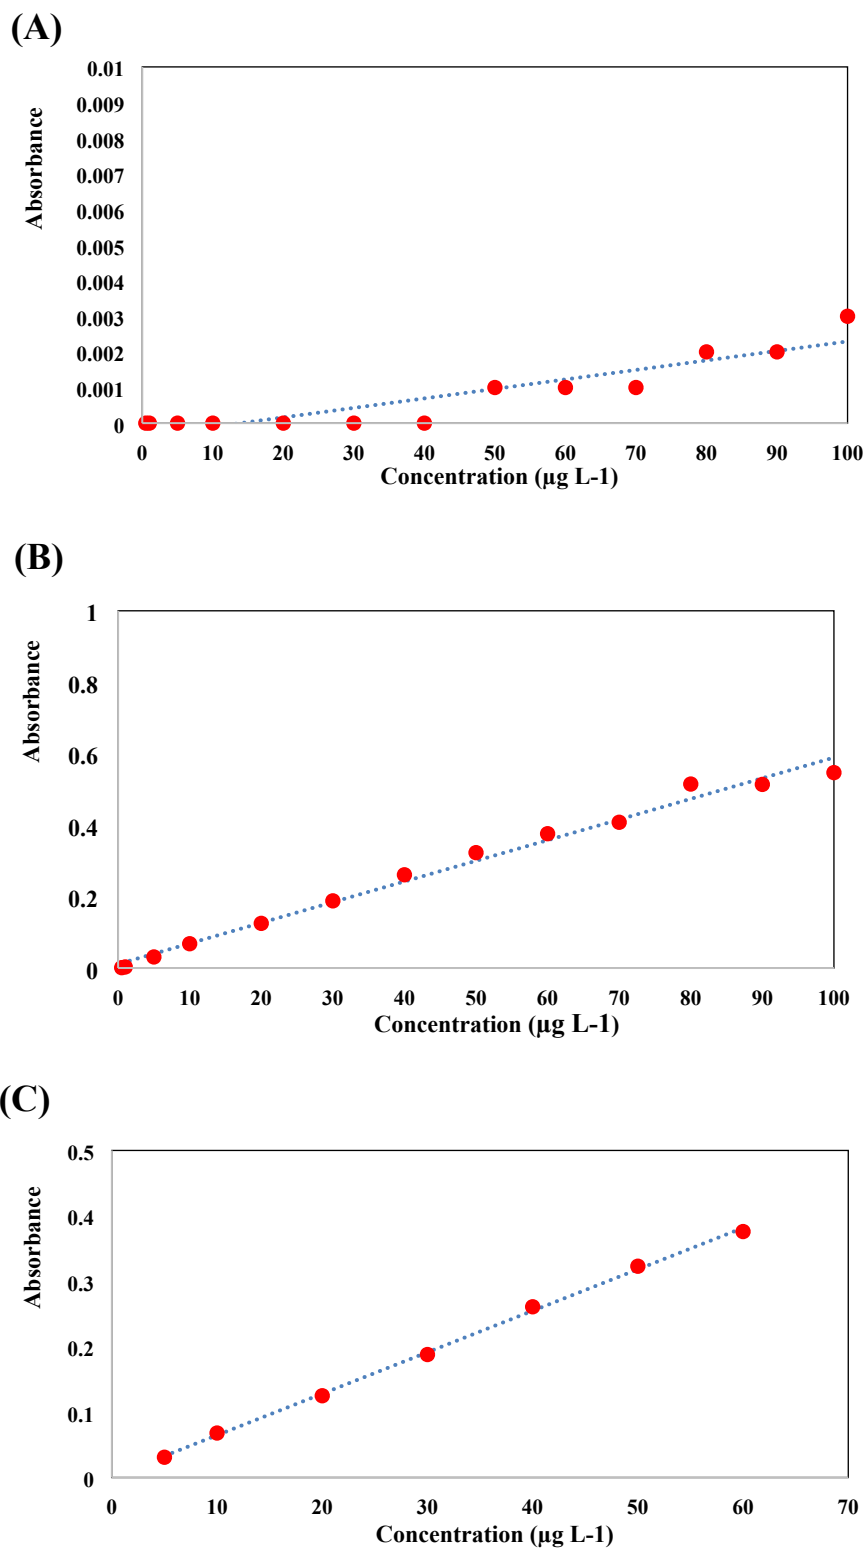

**Fig. S12** (A) The calibration curve before microextraction, (B) after microextraction, and (C) the estimated LDR.
